# Supplementary figures and images for: Diet-resistant obesity is characterized by a distinct plasma proteomic signature and impaired muscle fiber metabolism
Source: PubMed Central journal article supplement — Int J Obes (Lond). 2018 Feb 6;42(3):353–62. doi: 10.1038/ijo.2017.286 (PMC5880582; doi:10.1038/ijo.2017.286), 2018-02-06

# Supplementary Figure 2

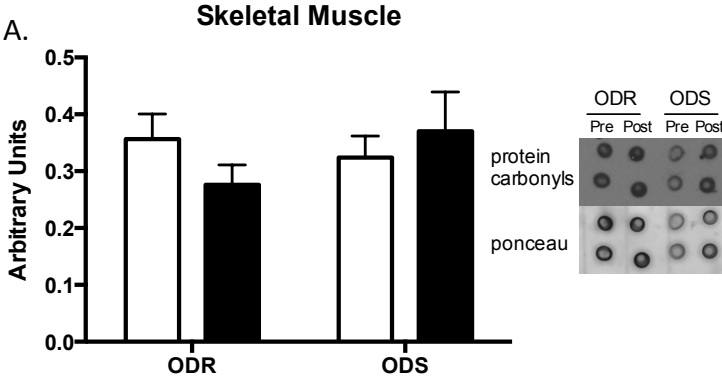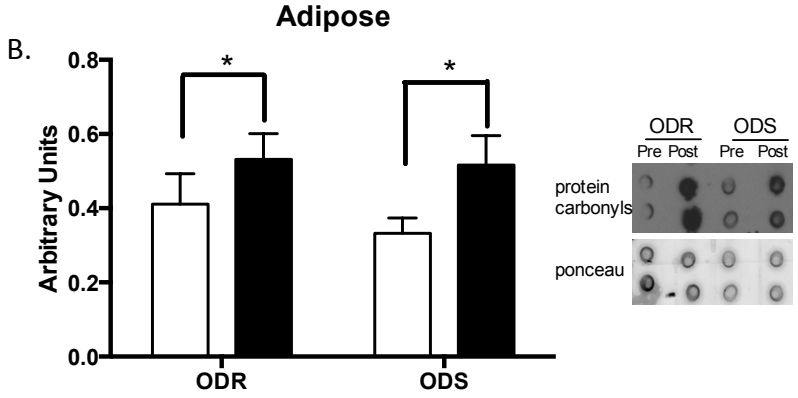

Supplement: ijo2017286x4.pdf [file ijo2017286x4.pdf]

# Supplemental Figure 3

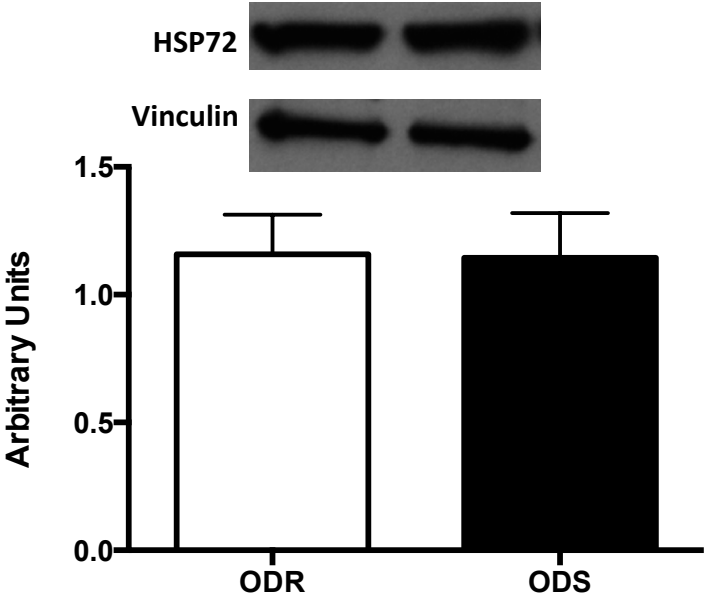

Supplement: ijo2017286x5.pdf [file ijo2017286x5.pdf]

## Supplementary Figure 5

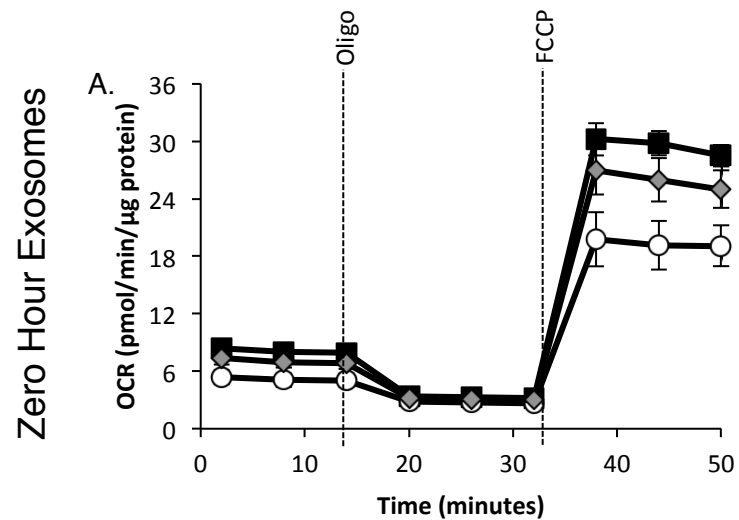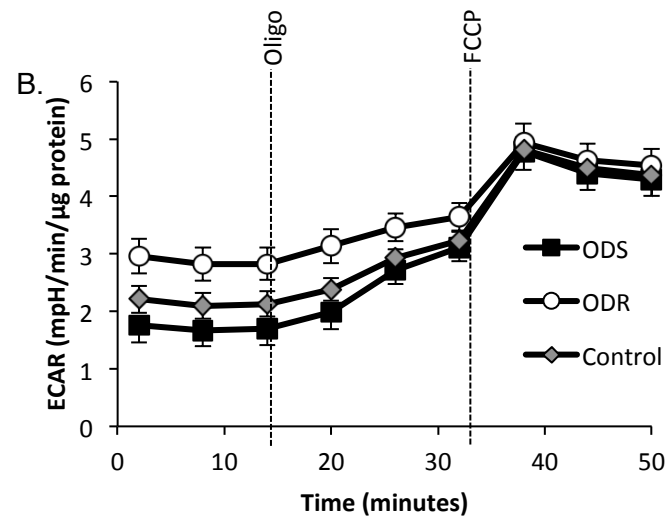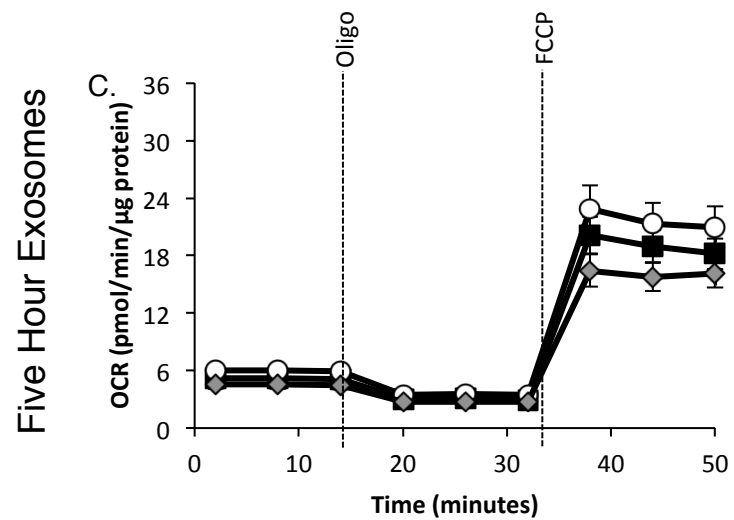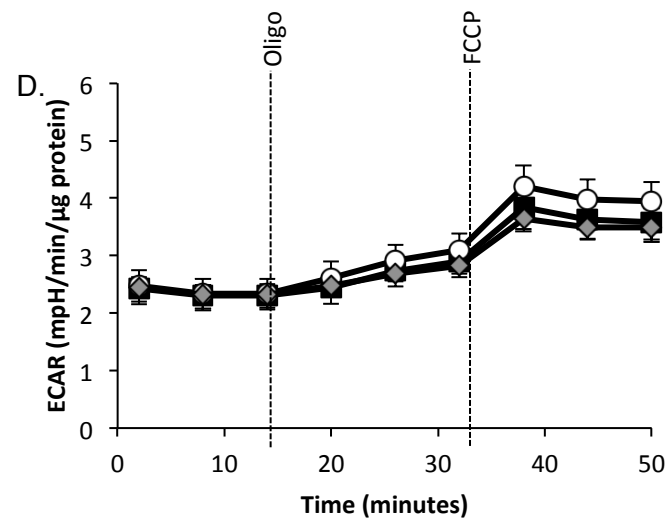

Supplement: ijo2017286x7.pdf [file ijo2017286x7.pdf]
